# Supplementary material for: Syntheses and Electrochemical and EPR Studies of Porphyrins Functionalized with Bulky Aromatic Amine Donors
Source: MDPI journal article supplement (doi:10.3390/molecules28114405), 2023-05-29
Supplement: s1 [file s1]

# Syntheses, electrochemical and EPR studies of porphyrins functionalized with bulky aromatic amine donors

Mary-Ambre Carvalho<sup>1</sup>, Khalissa Merahi<sup>1</sup>, Julien Haumesser<sup>1</sup>, Ana M. V. M. Pereira<sup>1</sup>, Nathalie Parizel<sup>1</sup>, Jean Weiss<sup>1</sup>, Maylis Oro<sup>2</sup>, Vincent Maurel<sup>3</sup>, Laurent Ruhlmann<sup>1,\*</sup>, Sylvie Choua<sup>1,\*</sup> and Romain Ruppert<sup>1,\*</sup>

## Supporting information

### Table of contents:

|                                                                                                                                                                                                                                                                                                                                                                                                             |    |
|-------------------------------------------------------------------------------------------------------------------------------------------------------------------------------------------------------------------------------------------------------------------------------------------------------------------------------------------------------------------------------------------------------------|----|
| Figure S1: <sup>1</sup> H NMR spectrum of compound <b>1</b>                                                                                                                                                                                                                                                                                                                                                 | 2  |
| Figure S2: MALDI-TOF MS of <b>1</b> (top) simulation (bottom)                                                                                                                                                                                                                                                                                                                                               | 3  |
| Figure S3: <sup>1</sup> H NMR spectrum of compound <b>4</b>                                                                                                                                                                                                                                                                                                                                                 | 4  |
| Figure S4: MALDI-TOF MS of <b>4</b> (top) simulation (bottom)                                                                                                                                                                                                                                                                                                                                               | 5  |
| Figure S5: <sup>1</sup> H NMR of compound <b>3</b> (top) and aromatic area (bottom).                                                                                                                                                                                                                                                                                                                        | 6  |
| Figure S6: <sup>13</sup> C NMR of compound <b>3</b> (top) and DEPT (bottom).                                                                                                                                                                                                                                                                                                                                | 7  |
| Figure S7: <sup>1</sup> H NMR of compound <b>6</b> .                                                                                                                                                                                                                                                                                                                                                        | 8  |
| Figure S8: HRMS (ESI-TOF) of compound <b>6</b> (top) and simulation (bottom).                                                                                                                                                                                                                                                                                                                               | 8  |
| Figure S9: <sup>13</sup> C NMR of compound <b>6</b> (top) and DEPT (bottom).                                                                                                                                                                                                                                                                                                                                | 9  |
| Figure S10: UV/Vis spectra during the stepwise electrochemical oxidation of <b>2</b> : (a) at the first oxidation potential; (b) at the second oxidation potential (recorded in dichloromethane, 0.1 M NBu <sub>4</sub> PF <sub>6</sub> ).                                                                                                                                                                  | 10 |
| Figure S11: a) X-band EPR spectrum of <b>2</b> in CH <sub>2</sub> Cl <sub>2</sub> fluid solution at room temperature (blue) and its simulation (red) b) <sup>1</sup> H-ENDOR spectrum of <b>2</b> in CH <sub>2</sub> Cl <sub>2</sub> fluid solution at 200K.                                                                                                                                                | 11 |
| Figure S12: a) X-band EPR spectrum of <b>3</b> in CH <sub>2</sub> Cl <sub>2</sub> fluid solution at room temperature b) <sup>1</sup> H-ENDOR spectrum of <b>3</b> in CH <sub>2</sub> Cl <sub>2</sub> fluid solution at 200 K.                                                                                                                                                                               | 11 |
| Figure S13: (++) and (+ -) quadrants of the <sup>1</sup> H and <sup>14</sup> N of X-band HYSCORE spectrum at 80 K of a) <b>2</b> b) <b>3</b> showing the location of <sup>14</sup> N cross-peaks weakly coupled nitrogen nuclei, respectively, and <sup>1</sup> H cross-ridges. Microwave frequency of 9.71 and 9.74 GHz respectively, magnetic field 350.0 and 352.5 mT respectively and time τ of 136 ns. | 12 |
| Figure S14: Experimental (blue) and simulated (red) X-band <sup>14</sup> N-HYSCORE spectra of a) <b>1</b> , b) <b>2</b> and c) <b>3</b> . The simulations are carried out using parameters given in Table 2 in the main text.                                                                                                                                                                               | 13 |
| Figure S15: Field-swept EPR spectra at 80 K of a) <b>1</b> b) <b>2</b> and c) <b>3</b> . Experimental (black) and simulated (red).                                                                                                                                                                                                                                                                          | 14 |
| Table S1: <sup>14</sup> N hyperfine coupling parameters in MHz obtained from simulations and experimental Field-swept EPR spectra.                                                                                                                                                                                                                                                                          | 14 |
| Figure S16: Experimental EPR spectrum of a) <b>5</b> and b) <b>6</b> in CH <sub>2</sub> Cl <sub>2</sub> fluid solution at room temperature.                                                                                                                                                                                                                                                                 | 14 |
| Figure S17: Experimental EPR spectrum of mixture <b>2</b> and <b>4</b> in CH <sub>2</sub> Cl <sub>2</sub> fluid solution generated by electrolysis at room temperature. Simulated spectrum was obtained by an admixture of 23% of monoradical and 77% of biradical.                                                                                                                                         | 14 |
| Figure S18: Temperature dependence of the EPR susceptibility (χT product) in CH <sub>2</sub> Cl <sub>2</sub> frozen solution for a) <b>5</b> and b) <b>4</b> .                                                                                                                                                                                                                                              | 15 |
| DFT calculations for compounds <b>1</b> , <b>2</b> , and <b>3</b> .                                                                                                                                                                                                                                                                                                                                         | 16 |

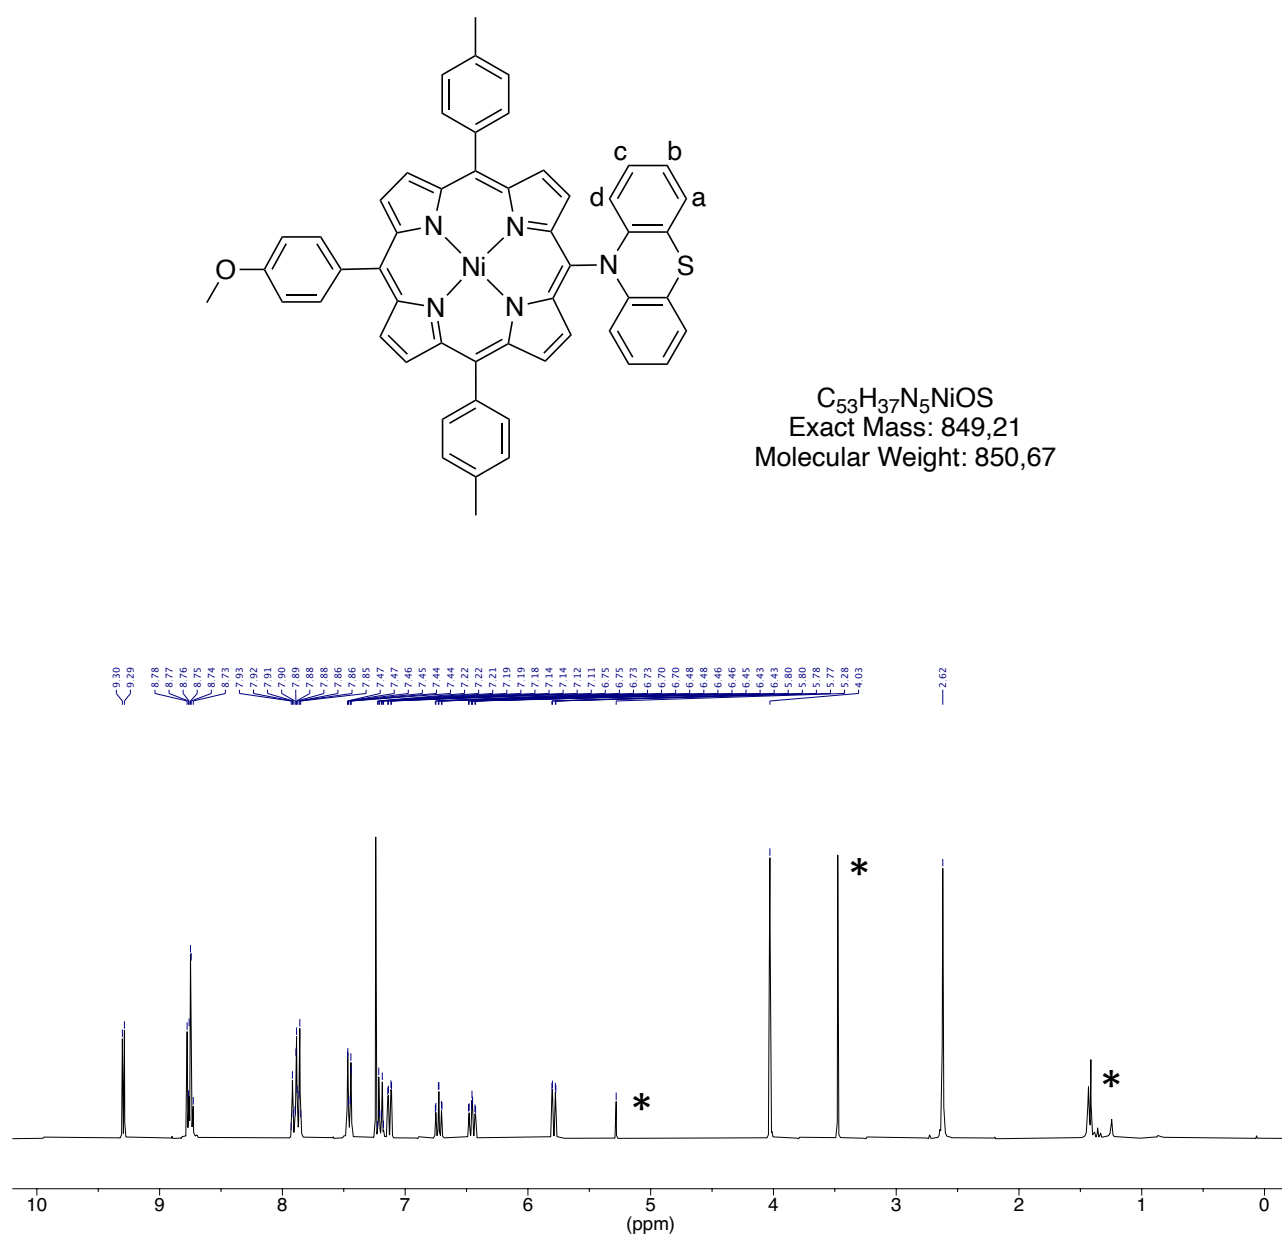

Figure S1:  $^1H$  NMR of compound **1** (\* residual solvent peaks,  $CH_2Cl_2$ ,  $CH_3OH$ ,  $C_6H_{12}$ ,  $H_2O$ ).

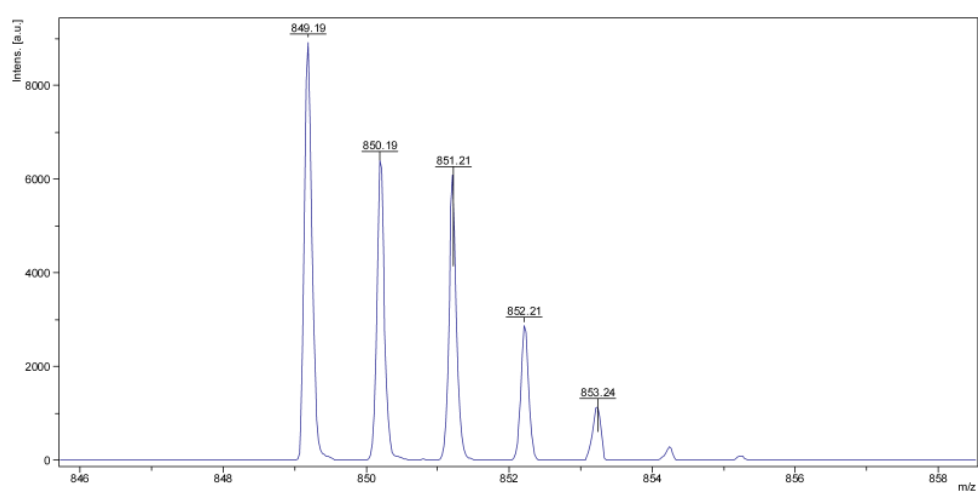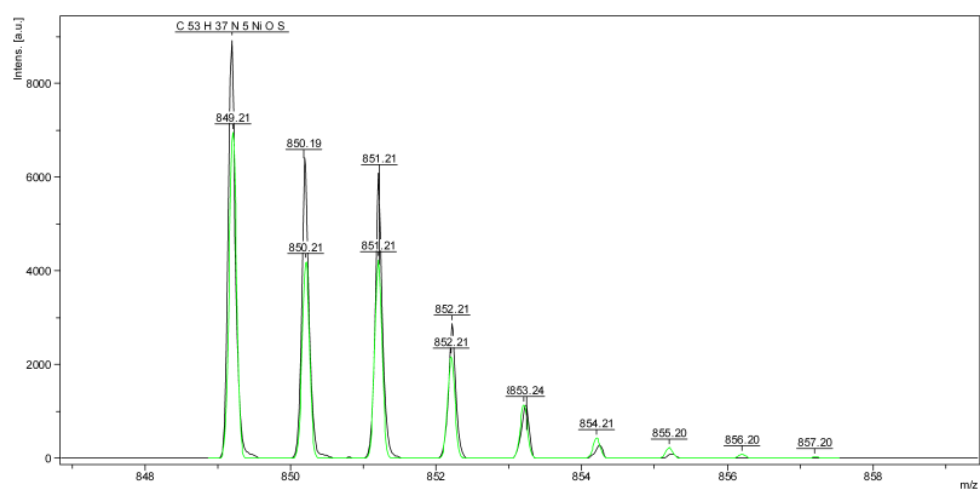

Figure S2: MS of compound **1**, Maldi-TOF (dithranol matrix)  
experimental data (top) and experimental data + simulation (bottom)

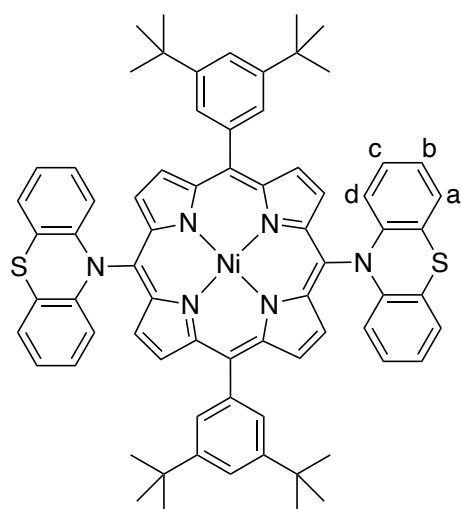

$C_{72}H_{66}N_6NiS_2$   
 Exact Mass: 1136,41  
 Molecular Weight: 1138,18

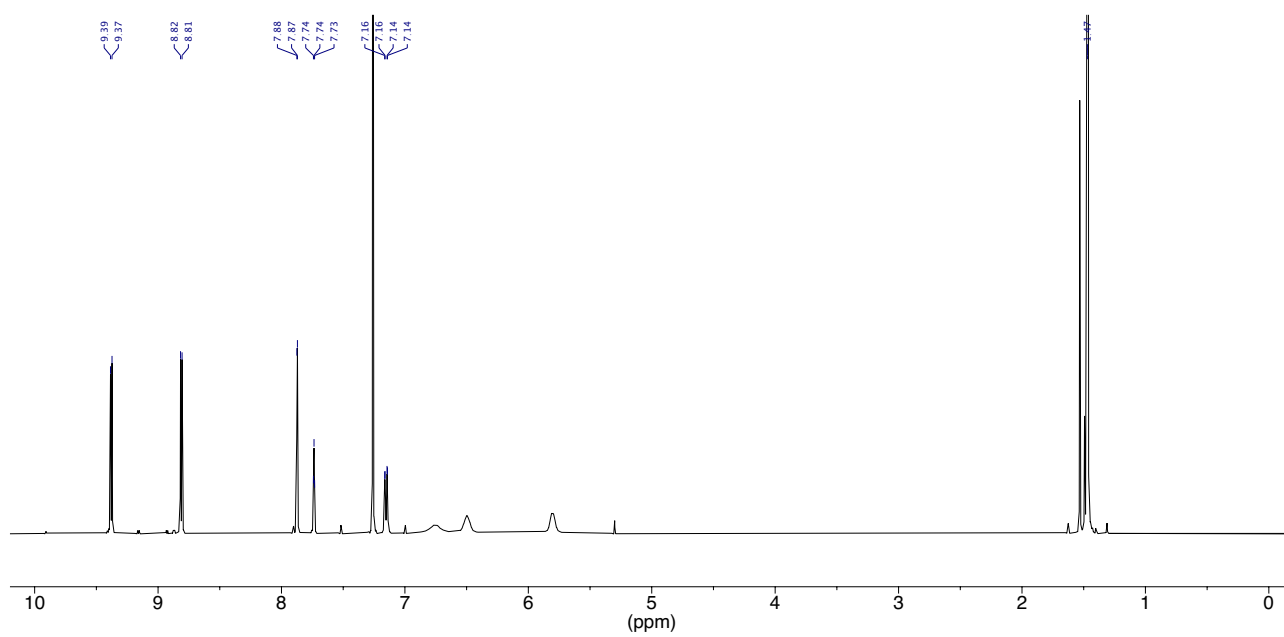

Figure S3:  $^1H$  NMR of compound **4**

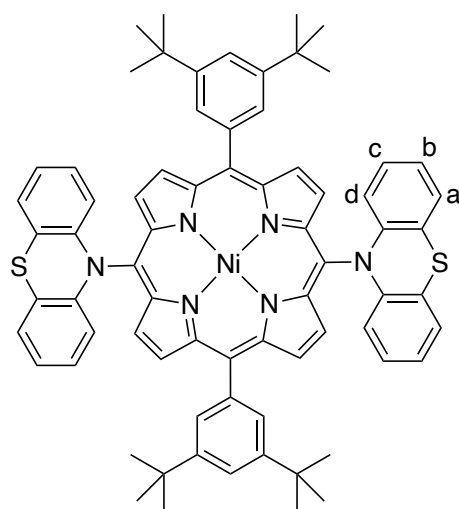

$C_{72}H_{66}N_6NiS_2$   
 Exact Mass: 1136,41  
 Molecular Weight: 1138,18

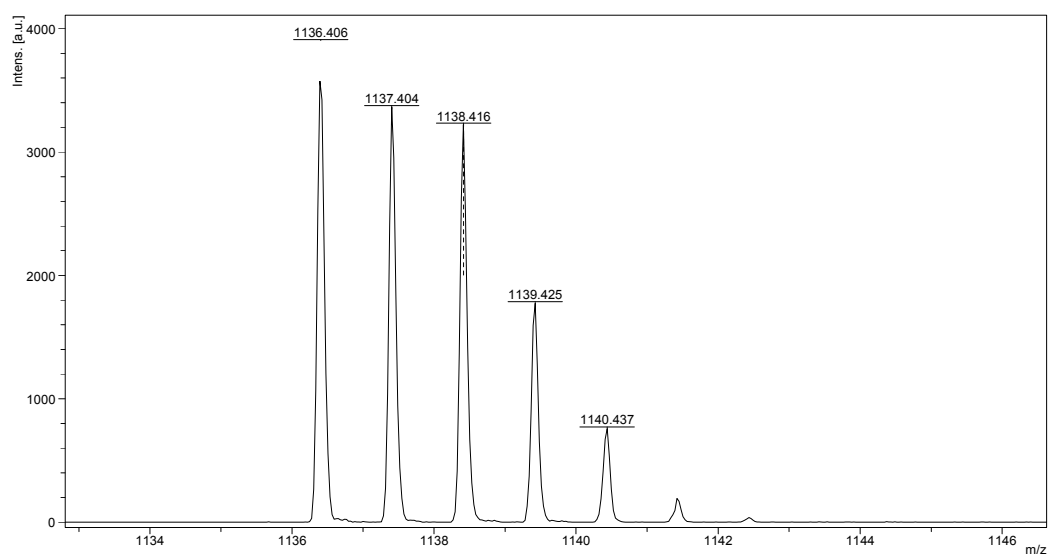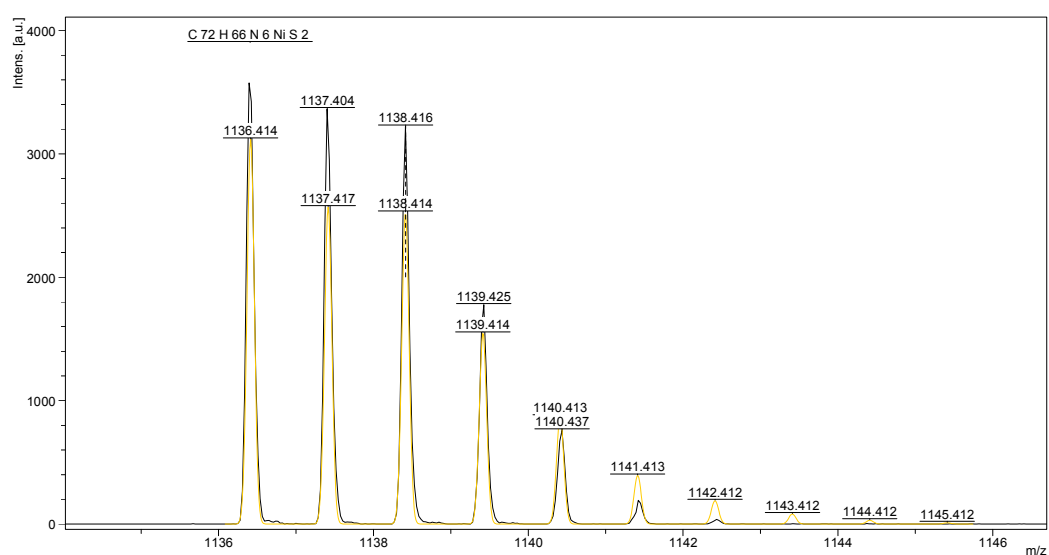

Figure S4: MS of compound **4**, Maldi-TOF (dithranol matrix) experimental data (top) and experimental data + simulation (bottom)

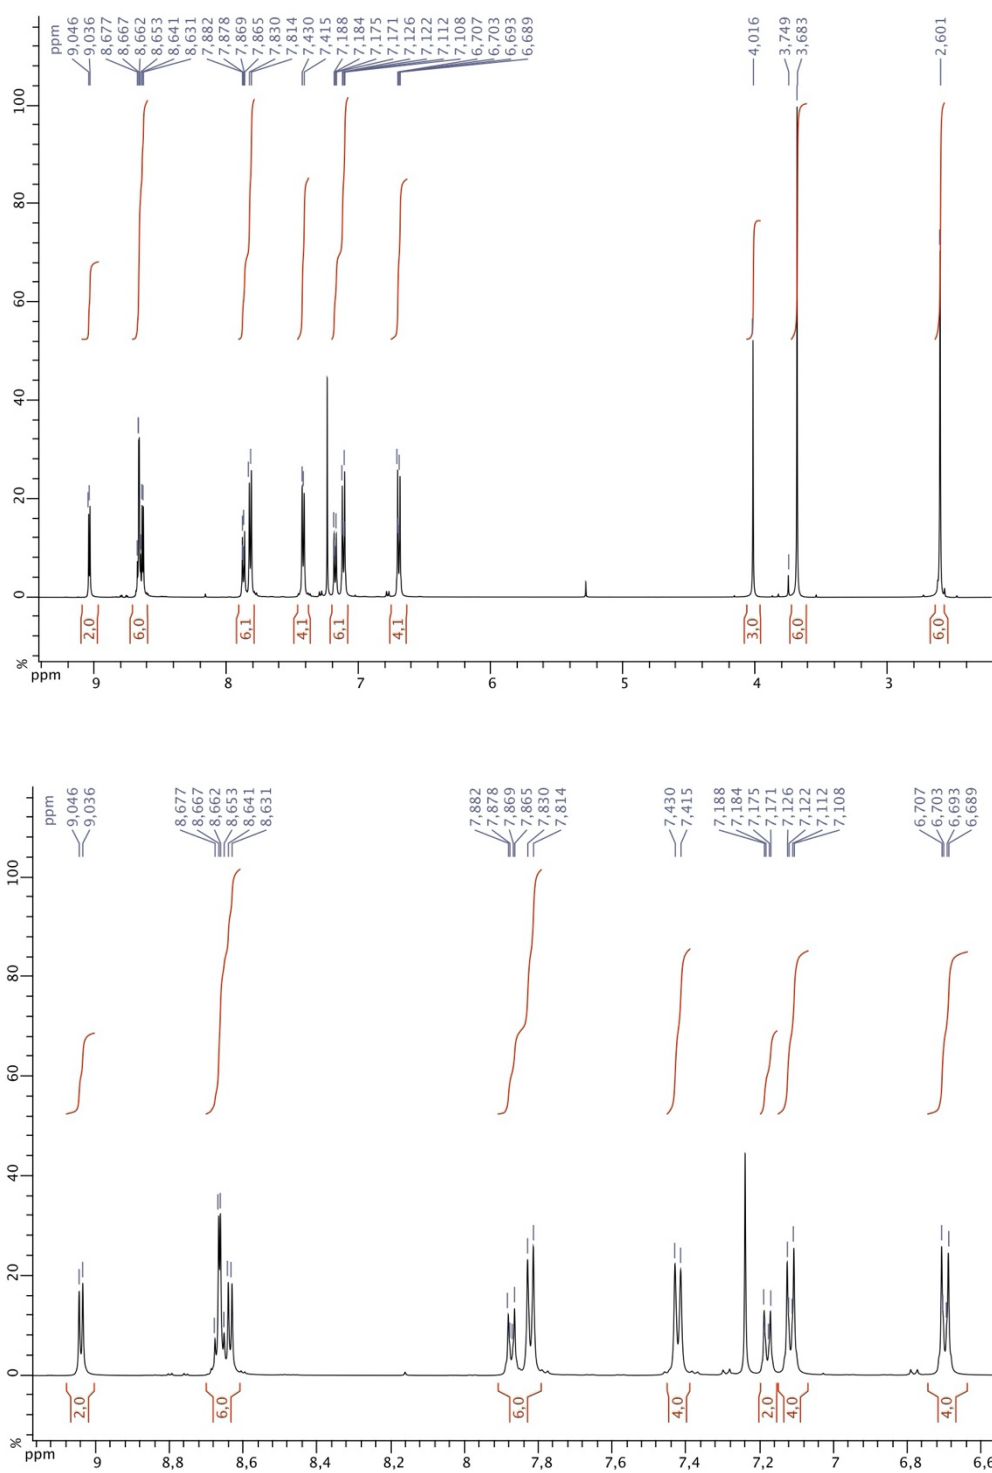

Figure S5:  $^1\text{H}$  NMR of compound **3** (top) and aromatic area (bottom).

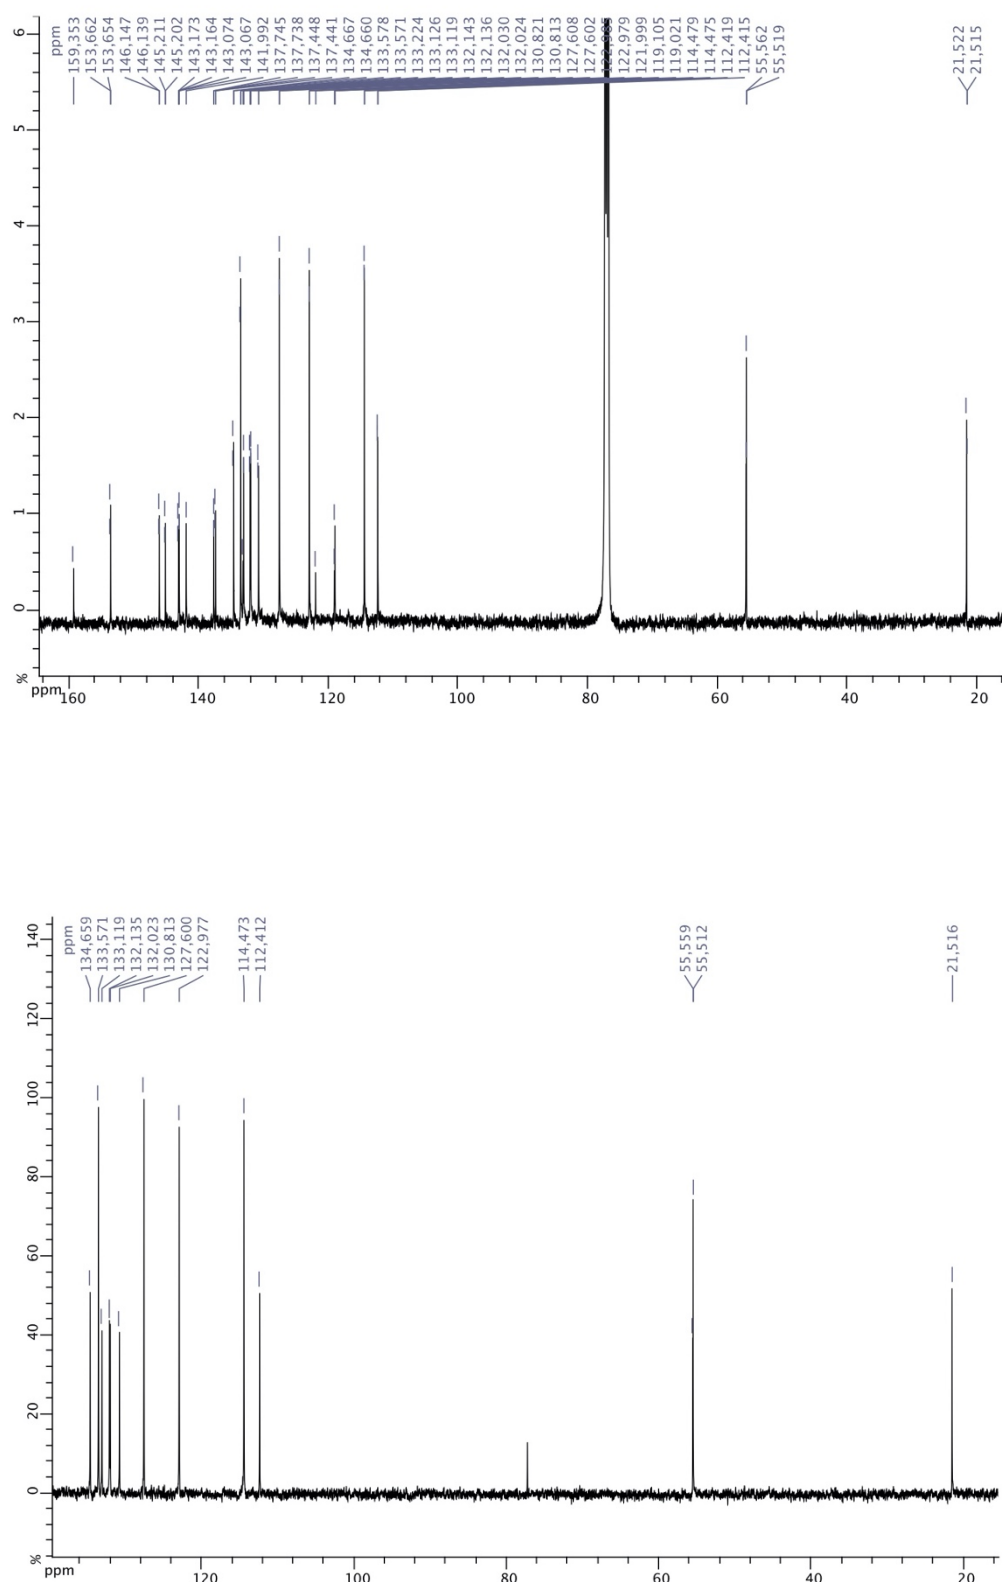

Figure S6:  $^{13}\text{C}$  NMR of compound **3** (top) and DEPT (bottom).

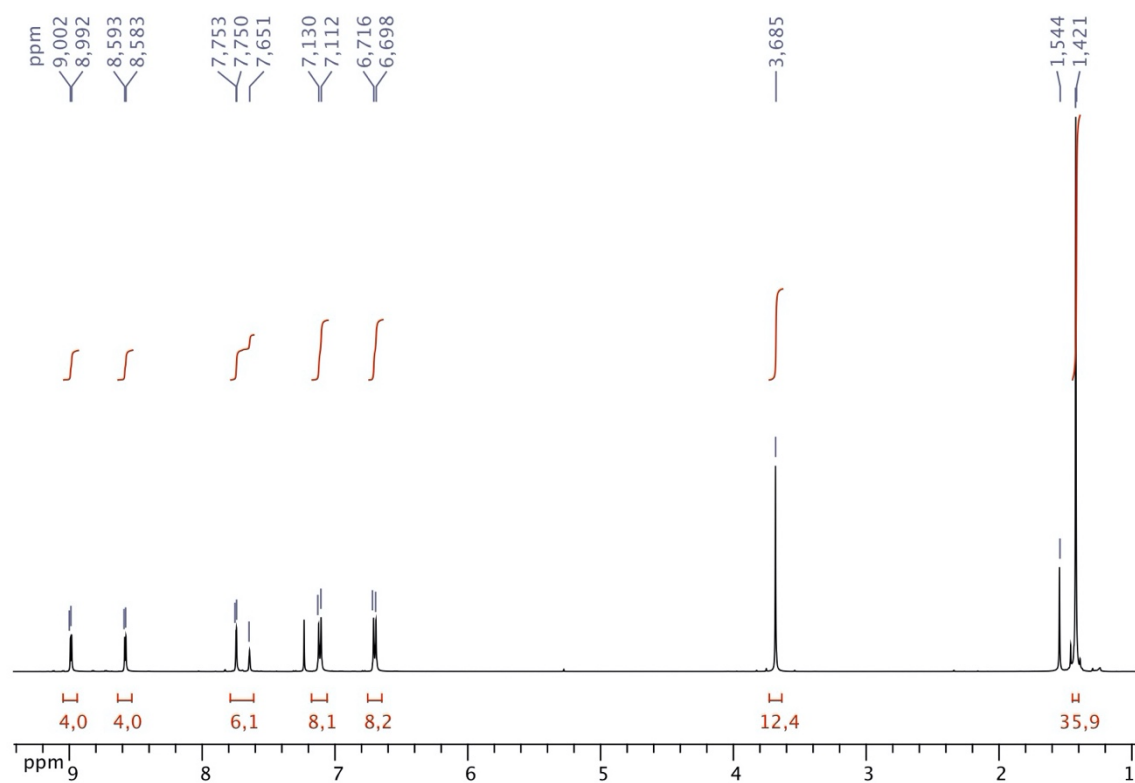

Figure S7:  $^1\text{H}$  NMR of compound **6**.

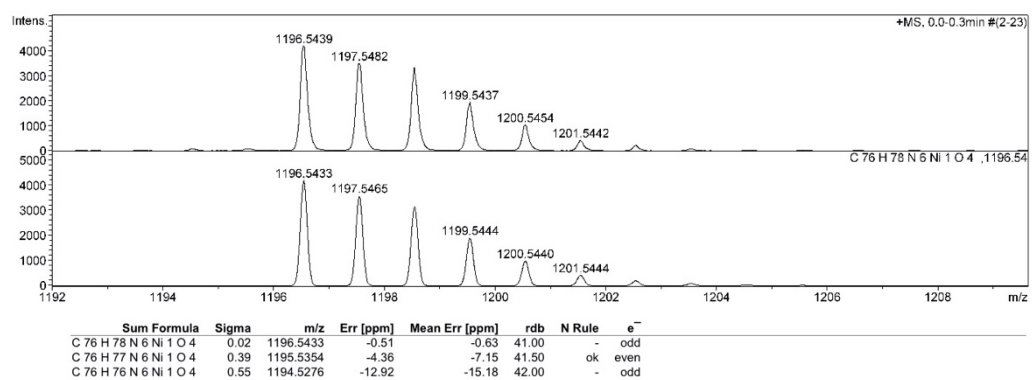

Figure S8: HRMS (ESI-TOF) of compound **6** (top) and simulation (bottom).



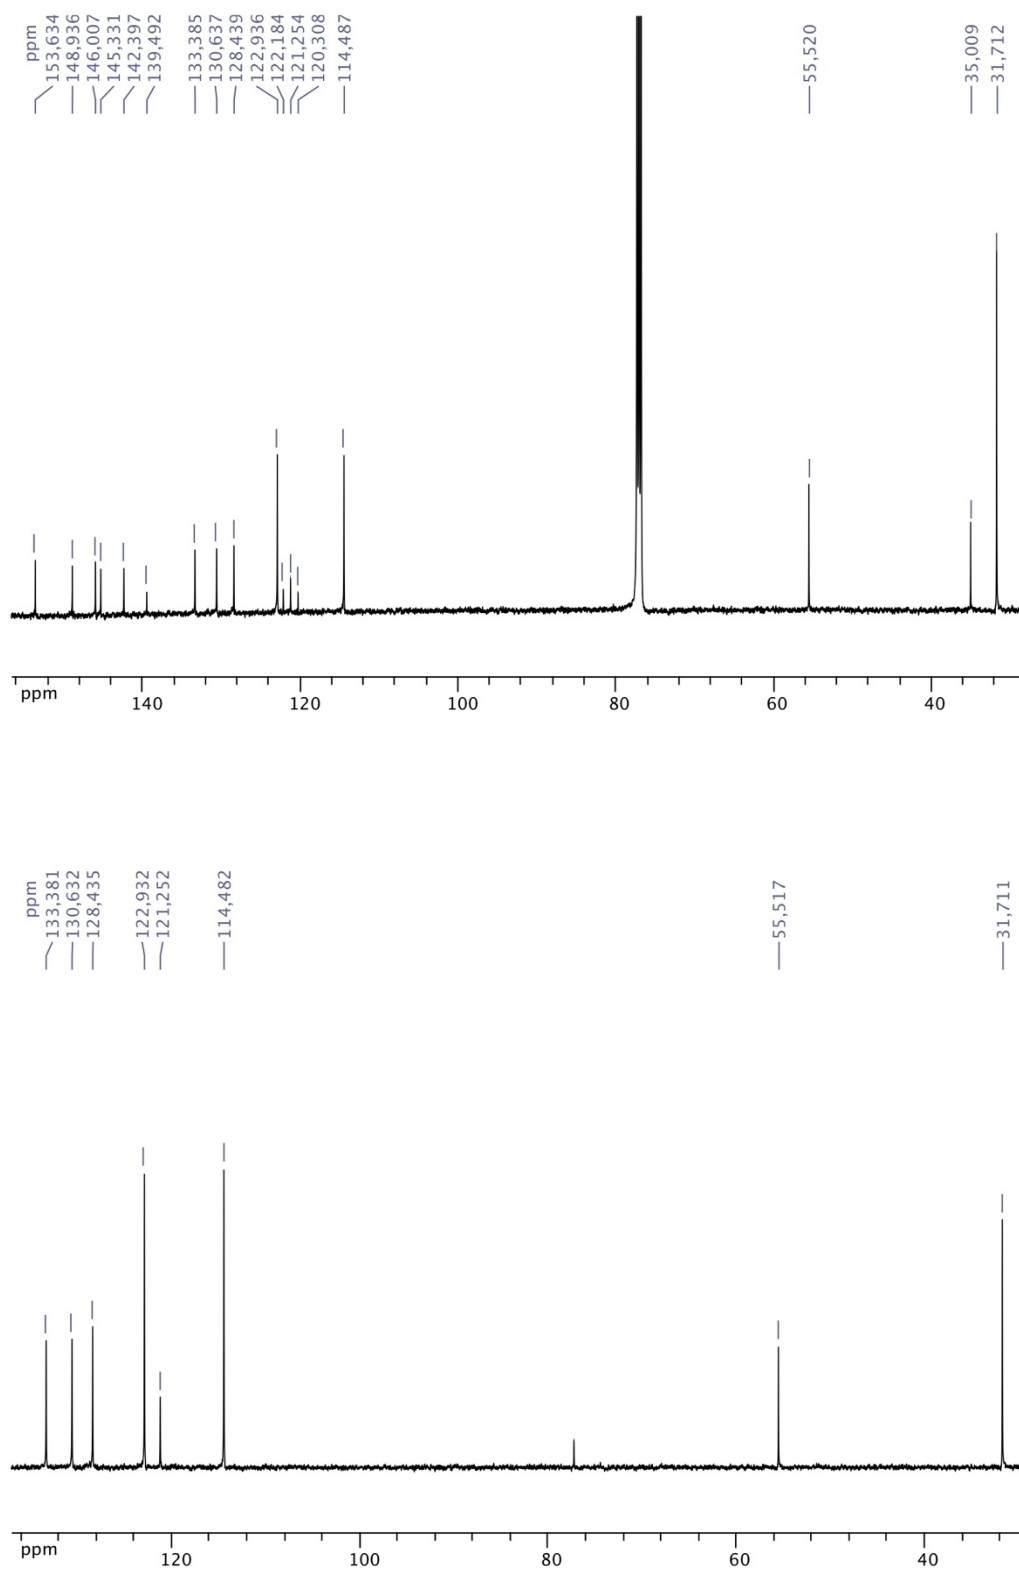

Figure S9:  $^{13}\text{C}$  NMR of compound 6 (top) and DEPT (bottom).

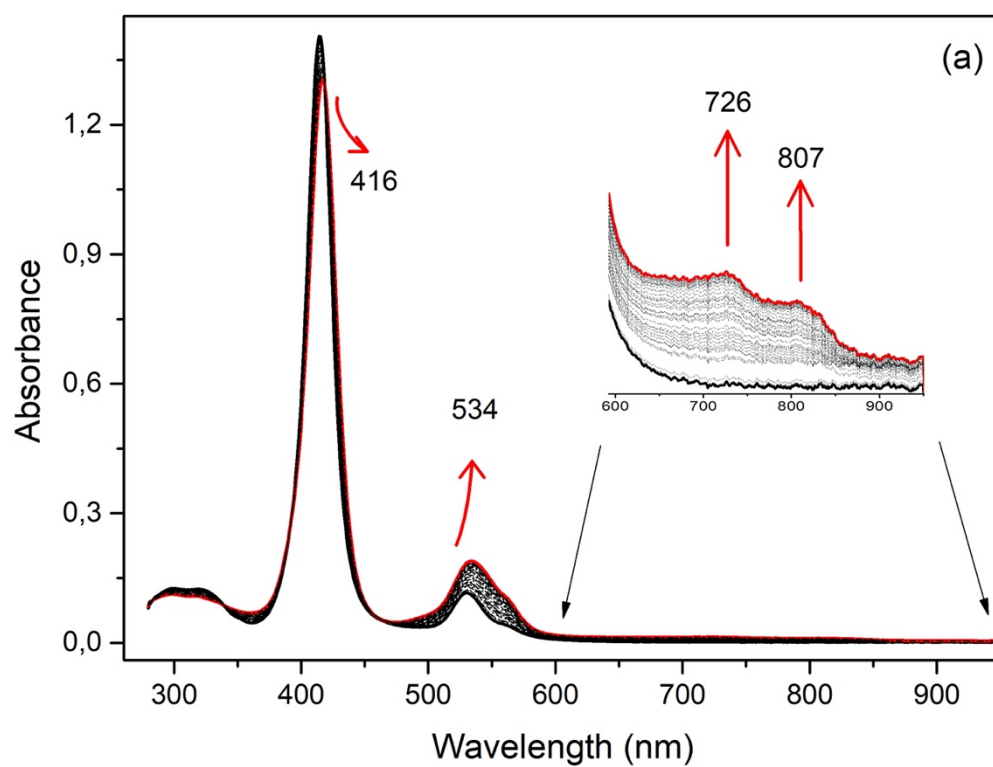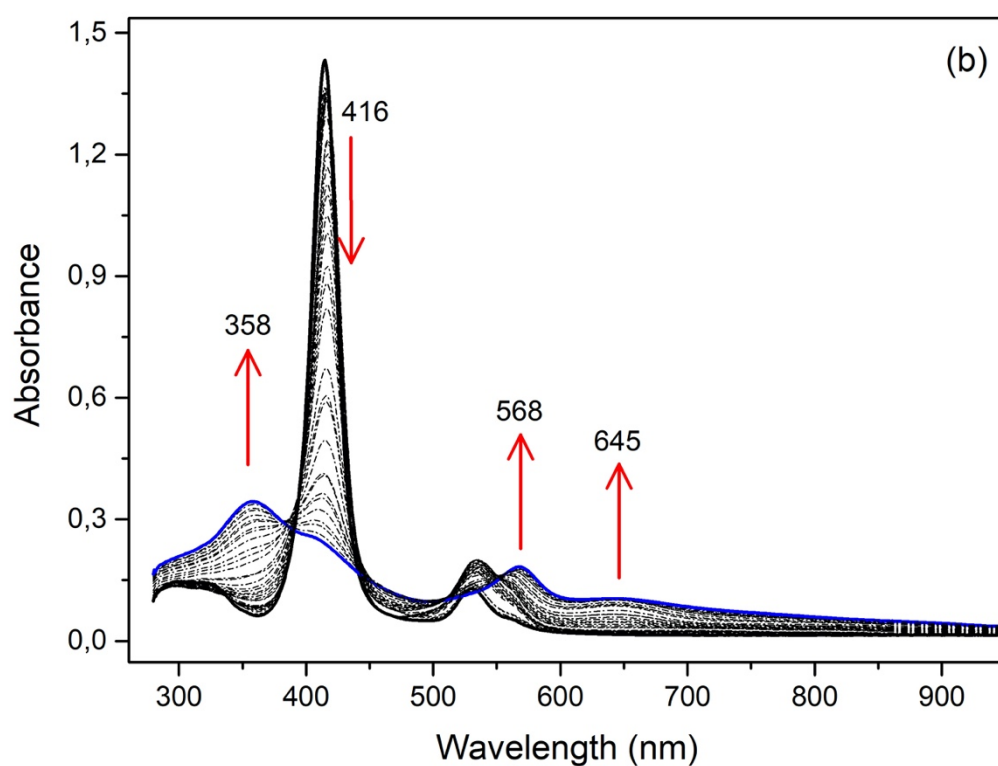

Figure S10: UV/Vis spectra during the stepwise electrochemical oxidation of **2**: (a) at the first oxidation potential; (b) at the second oxidation potential (recorded in dichloromethane, 0.1 M NBu<sub>4</sub>PF<sub>6</sub>).

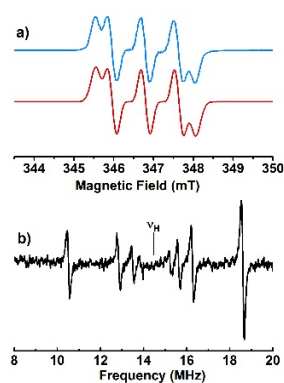

Figure S11: a) X-band EPR spectrum of **2** in  $\text{CH}_2\text{Cl}_2$  fluid solution at room temperature (blue) and its simulation (red) b)  $^1\text{H}$ -ENDOR spectrum of **2** in  $\text{CH}_2\text{Cl}_2$  fluid solution at 200K.

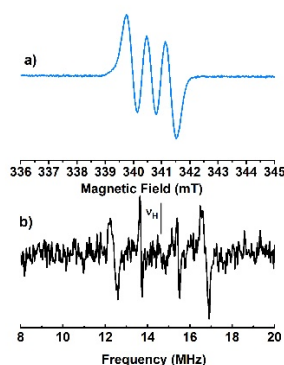

Figure S12: a) X-band EPR spectrum of **3** in  $\text{CH}_2\text{Cl}_2$  fluid solution at room temperature b)  $^1\text{H}$ -ENDOR spectrum of **3** in  $\text{CH}_2\text{Cl}_2$  fluid solution at 200 K.

a)

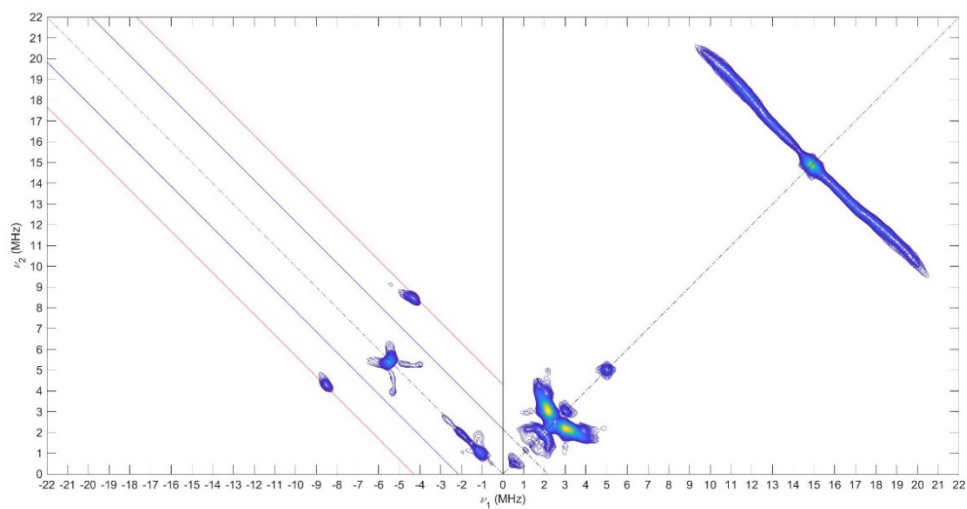

b)

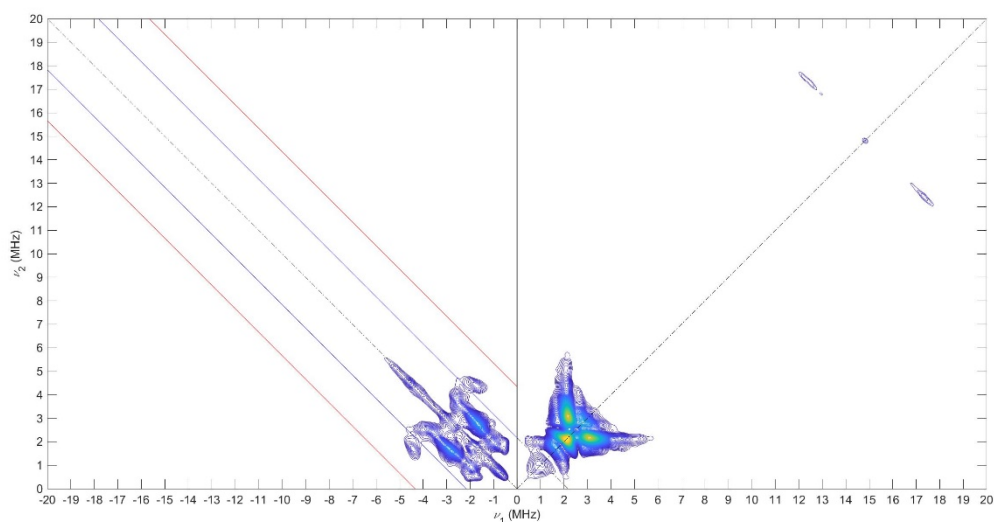

Figure S13: (++) and (+ -) quadrants of the  $^1\text{H}$  and  $^{14}\text{N}$  of X-band HYSCORE spectrum at 80 K of a) **2** b) **3** showing the location of  $^{14}\text{N}$  cross-peaks weakly coupled nitrogen nuclei, respectively, and  $^1\text{H}$  cross-ridges. Microwave frequency of 9.71 and 9.74 GHz respectively, magnetic field 350.0 and 352.5 mT respectively and time  $\tau$  of 136 ns.

a)

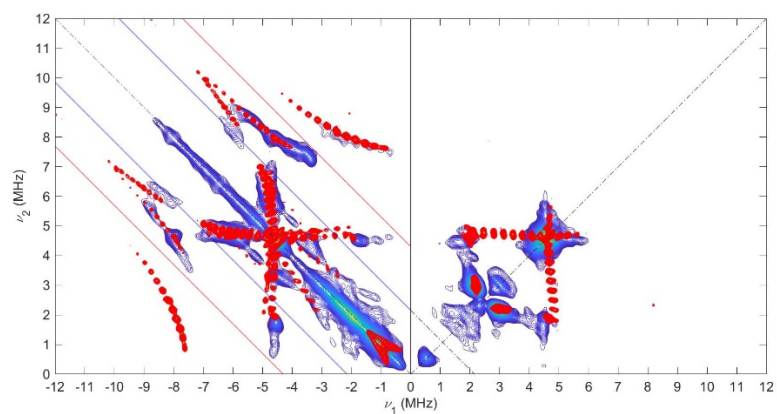

b)

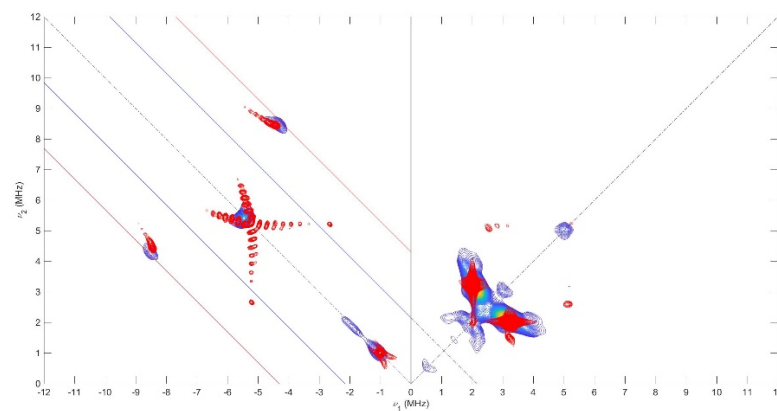

c)

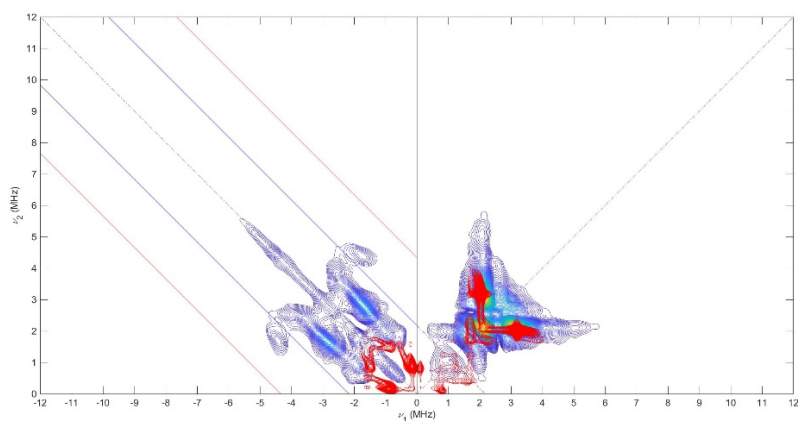

Figure S14: Experimental (blue) and simulated (red) X-band  $^{14}\text{N}$ -HYSCORE spectra of a) **1**, b) **2** and c) **3**. The simulations are carried out using parameters given in Table 3 in the main text.

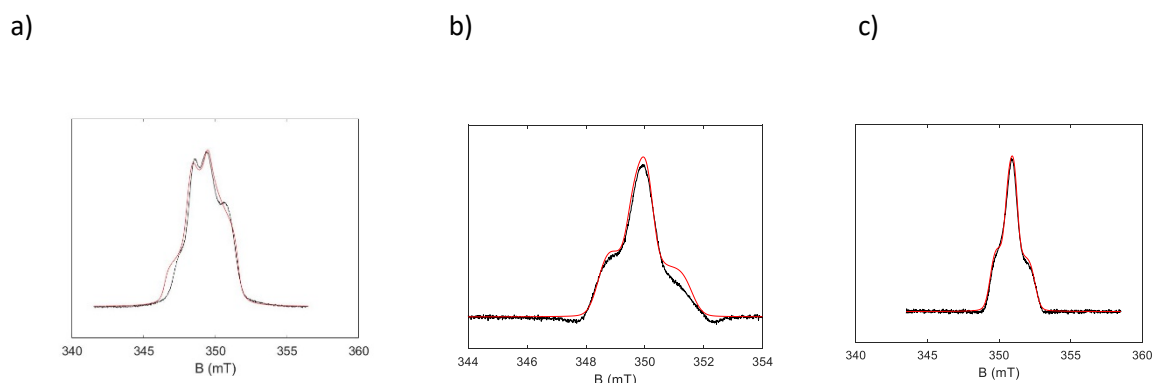

Figure S15: Field-swept EPR spectra at 80 K of a) **1** b) **2** and c) **3**. Experimental (black) and simulated (red).

| Table S1: $^{14}\text{N}$ hyperfine coupling parameters in MHz obtained from simulations and experimental Field-swept EPR spectra. |       |       |       |       |       |       |
|------------------------------------------------------------------------------------------------------------------------------------|-------|-------|-------|-------|-------|-------|
|                                                                                                                                    | Exp   |       |       | DFT   |       |       |
|                                                                                                                                    | $A_x$ | $A_y$ | $A_z$ | $A_x$ | $A_y$ | $A_z$ |
| <b>2</b>                                                                                                                           | 2     | 2     | 44    | 1     | 1.3   | 51    |
| <b>1</b>                                                                                                                           | 1     | 1     | 42    | 1     | 1.1   | 43    |
| <b>3</b>                                                                                                                           | 2     | 2     | 44    | 1.3   | 1.3   | 42    |

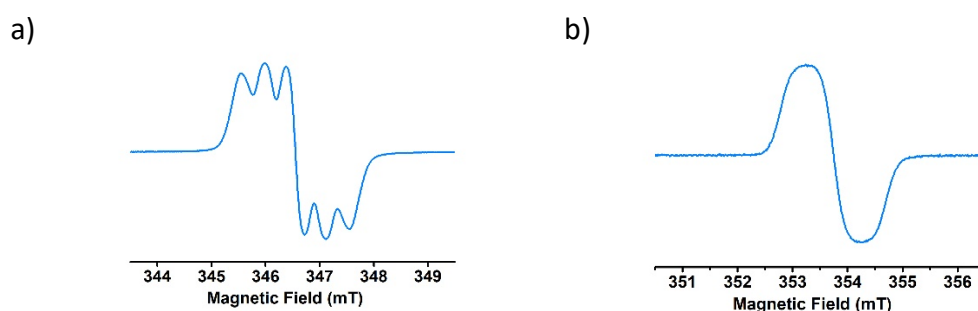

Figure S16: Experimental EPR spectrum of a) **5** and b) **6** in  $\text{CH}_2\text{Cl}_2$  fluid solution at room temperature.

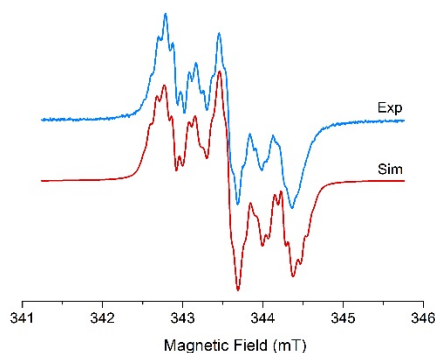

Figure S17: Experimental EPR spectrum of mixture **2** and **4** in  $\text{CH}_2\text{Cl}_2$  fluid solution generated by electrolysis at room temperature. Simulated spectrum was obtained by an admixture of 23% of monoradical and 77% of biradical.

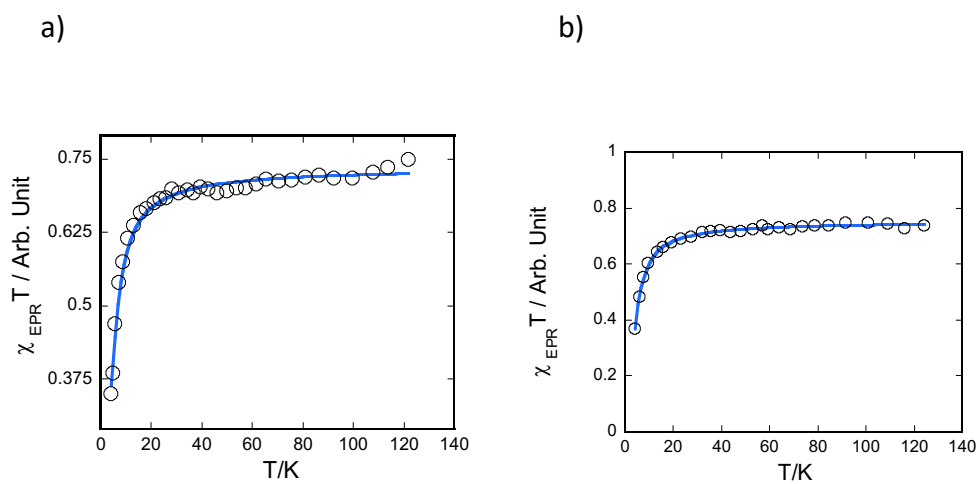

Figure S18: Temperature dependence of the EPR susceptibility ( $\chi T$  product) in  $\text{CH}_2\text{Cl}_2$  frozen solution for a) **5** and b) **4**.

## DFT calculations

This section reports the DFT-computed  $^{14}\text{N}$  hyperfine and nuclear quadrupole principal values for **1**, **2** and **3** using the B3LYP functional with the CP(PPP) basis for the metal centre and the EPR-II basis set for others centers. The Singly Localized Molecular Orbitals (SOMOs) and the optimized structures are also provided and were calculated using the B3LYP functional with the 6-31g\* basis set for all atoms.

### Compound 1

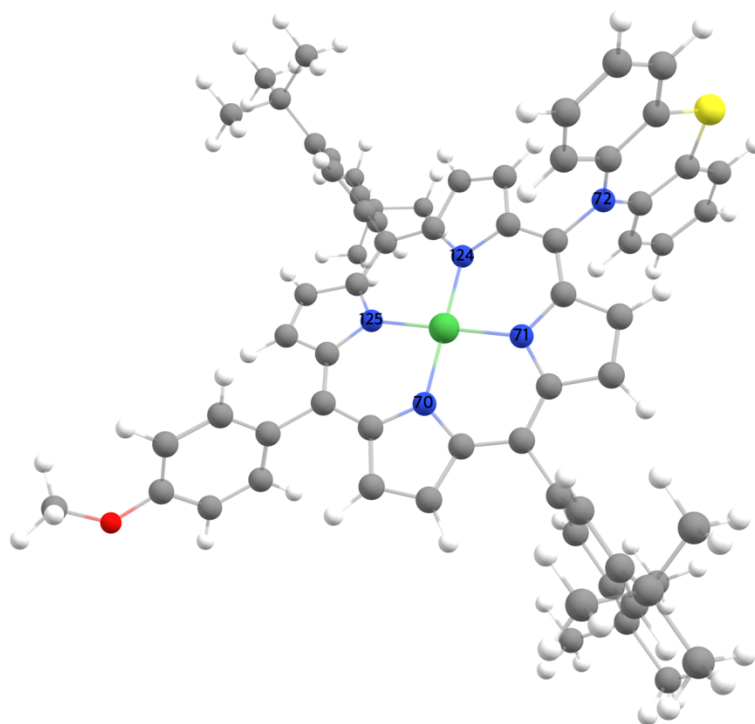

Atom labelling for mono-oxidized compound **1**

#### Hyperfine coupling constant

| Center | $A_{\min}$ (MHz) | $A_{\text{mid}}$ (MHz) | $A_{\max}$ (MHz) | $A_{\text{iso}}$ (MHz) |
|--------|------------------|------------------------|------------------|------------------------|
| N70    | -0.01            | 0.01                   | 0.03             | 0.01                   |
| N71    | 0.23             | 0.28                   | 0.54             | 0.35                   |
| N72    | 0.97             | 1.12                   | 42.86            | 14.98                  |
| N124   | 0.24             | 0.28                   | 0.55             | 0.35                   |
| N125   | -0.01            | 0.02                   | 0.03             | 0.01                   |

#### Quadrupole coupling constants

| Center | $V_{\min}$ (a.u.) | $V_{\text{mid}}$ (a.u.) | $V_{\max}$ (a.u.) | $e^2qQ$ (MHz) | eta  |
|--------|-------------------|-------------------------|-------------------|---------------|------|
| N70    | -0.20             | -0.24                   | 0.44              | 1.99          | 0.09 |
| N71    | -0.21             | -0.26                   | 0.47              | 2.14          | 0.10 |
| N72    | 0.31              | 0.39                    | -0.71             | -3.21         | 0.12 |
| N124   | -0.21             | -0.26                   | 0.47              | 2.14          | 0.12 |
| N125   | -0.20             | -0.24                   | 0.44              | 1.99          | 0.09 |



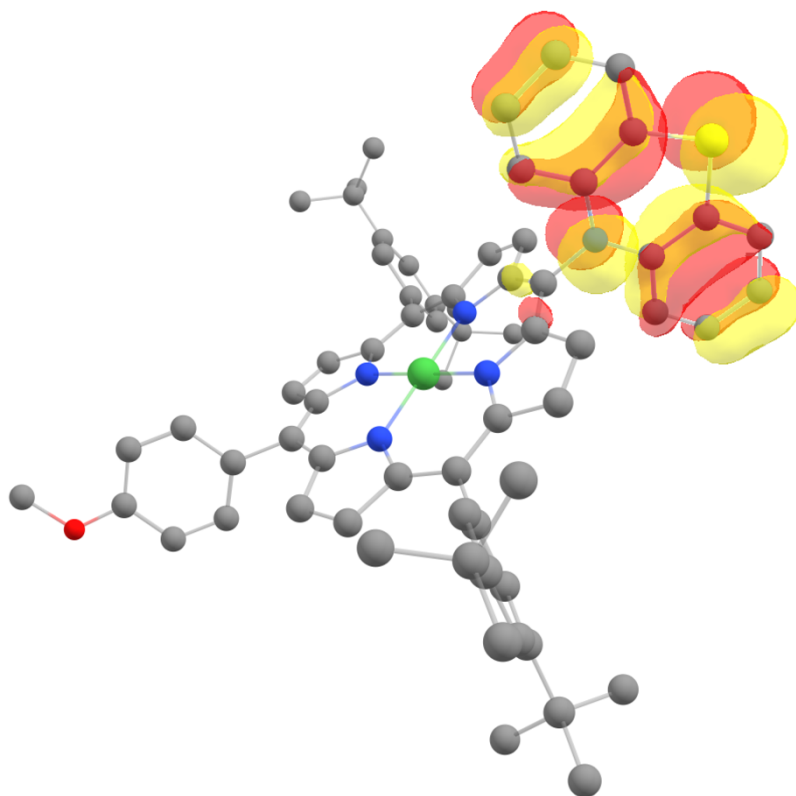

Localized SOMO for **1**.

Cartesian coordinates (Å) of the DFT-optimized structure of mono-oxidized compound **1**

|   |           |           |           |
|---|-----------|-----------|-----------|
| C | 1.701092  | 22.712718 | -2.512058 |
| C | 2.502092  | 21.536611 | -2.720993 |
| H | 3.008805  | 21.288002 | -3.638232 |
| C | 2.498813  | 20.844828 | -1.557116 |
| H | 2.995572  | 19.915432 | -1.333892 |
| C | 1.651855  | 21.563109 | -0.644677 |
| C | 1.299656  | 21.073187 | 0.611877  |
| C | 0.285219  | 21.646913 | 1.363313  |
| C | -0.252793 | 21.063481 | 2.564059  |
| H | 0.125940  | 20.175457 | 3.041370  |
| C | -1.309513 | 21.822406 | 2.938045  |
| H | -1.957892 | 21.676396 | 3.786632  |
| C | -1.390486 | 22.903728 | 1.994500  |
| C | -2.269118 | 23.969993 | 2.096327  |
| C | -2.922109 | 24.428129 | 4.405638  |
| C | -1.632849 | 24.963803 | 4.613026  |
| H | -0.925063 | 24.976650 | 3.799278  |
| C | -1.265365 | 25.469882 | 5.839571  |
| H | -0.269289 | 25.873273 | 5.967035  |
| C | -2.163817 | 25.467742 | 6.917407  |
| H | -1.867629 | 25.867172 | 7.878444  |
| C | -3.429709 | 24.953381 | 6.745054  |
| H | -4.135765 | 24.945292 | 7.566341  |
| C | -3.820388 | 24.433348 | 5.502091  |
| C | -5.568398 | 23.264861 | 3.766365  |
| C | -6.800031 | 22.703618 | 3.397757  |

|    |           |           |           |
|----|-----------|-----------|-----------|
| H  | -7.592716 | 22.640255 | 4.133060  |
| C  | -6.996968 | 22.238289 | 2.116487  |
| H  | -7.949020 | 21.806266 | 1.837496  |
| C  | -5.956001 | 22.328442 | 1.180026  |
| H  | -6.103079 | 21.963895 | 0.171733  |
| C  | -4.741027 | 22.876565 | 1.525373  |
| H  | -3.955848 | 22.934780 | 0.788271  |
| C  | -4.509206 | 23.363457 | 2.829791  |
| C  | 1.986241  | 19.845937 | 1.129588  |
| C  | 3.232202  | 19.957958 | 1.743644  |
| H  | 3.680636  | 20.939889 | 1.830674  |
| C  | 3.894617  | 18.833688 | 2.244671  |
| C  | 3.267795  | 17.591168 | 2.103806  |
| H  | 3.765751  | 16.713587 | 2.483822  |
| C  | 2.020541  | 17.441498 | 1.487526  |
| C  | 1.390862  | 18.591850 | 1.004349  |
| H  | 0.425577  | 18.522792 | 0.517984  |
| C  | 5.266787  | 18.996737 | 2.923693  |
| C  | 6.267157  | 19.608711 | 1.918108  |
| H  | 7.246862  | 19.730869 | 2.388181  |
| H  | 5.940713  | 20.589508 | 1.568039  |
| H  | 6.387905  | 18.961374 | 1.045769  |
| C  | 5.842604  | 17.658406 | 3.417644  |
| H  | 5.194694  | 17.183155 | 4.157781  |
| H  | 6.810703  | 17.835000 | 3.891620  |
| H  | 5.999609  | 16.954742 | 2.596997  |
| C  | 5.128770  | 19.938486 | 4.141249  |
| H  | 4.426118  | 19.529597 | 4.871803  |
| H  | 4.775023  | 20.928995 | 3.849366  |
| H  | 6.097349  | 20.060740 | 4.633457  |
| C  | 1.338058  | 16.071828 | 1.321144  |
| C  | 2.159269  | 14.926223 | 1.936525  |
| H  | 3.139049  | 14.825678 | 1.463912  |
| H  | 1.628212  | 13.982530 | 1.793795  |
| H  | 2.308269  | 15.062762 | 3.010191  |
| C  | -0.043700 | 16.094728 | 2.010424  |
| H  | 0.057138  | 16.296395 | 3.079980  |
| H  | -0.537896 | 15.126526 | 1.892979  |
| H  | -0.698399 | 16.856371 | 1.583480  |
| C  | 1.151218  | 15.776127 | -0.183951 |
| H  | 0.530649  | 16.530942 | -0.670491 |
| H  | 0.667162  | 14.805230 | -0.320087 |
| H  | 2.115242  | 15.749249 | -0.698184 |
| N  | 1.169120  | 22.707800 | -1.238690 |
| N  | -0.419683 | 22.787421 | 1.030673  |
| N  | -3.269751 | 23.918314 | 3.153400  |
| S  | -5.448356 | 23.815296 | 5.416205  |
| Ni | -0.081678 | 24.007537 | -0.473596 |
| C  | -2.219083 | 25.116822 | 1.322020  |
| C  | -3.001998 | 26.298543 | 1.561345  |
| H  | -3.772435 | 26.404469 | 2.307712  |
| C  | -2.558330 | 27.235971 | 0.690997  |
| H  | -2.899135 | 28.251856 | 0.581208  |
| C  | -1.536128 | 26.620129 | -0.112469 |
| C  | -0.917740 | 27.245606 | -1.184644 |
| C  | -0.101892 | 26.548275 | -2.072100 |

|   |           |           |            |
|---|-----------|-----------|------------|
| C | 0.394456  | 27.109922 | -3.298525  |
| H | 0.263513  | 28.134433 | -3.604424  |
| C | 1.016749  | 26.109976 | -3.966478  |
| H | 1.507163  | 26.155654 | -4.924328  |
| C | 0.940946  | 24.938639 | -3.135564  |
| C | 1.575742  | 23.738290 | -3.444211  |
| C | -1.203972 | 28.695127 | -1.437957  |
| C | -2.251360 | 29.071377 | -2.276661  |
| H | -2.844748 | 28.294969 | -2.744039  |
| C | -2.540843 | 30.418131 | -2.511368  |
| C | -1.743054 | 31.376049 | -1.876296  |
| H | -1.953844 | 32.419804 | -2.046139  |
| C | -0.683904 | 31.033783 | -1.029647  |
| C | -0.428339 | 29.675144 | -0.822334  |
| H | 0.382837  | 29.364132 | -0.175639  |
| C | -3.715587 | 30.797939 | -3.430599  |
| C | -5.032574 | 30.274216 | -2.813890  |
| H | -5.879773 | 30.537904 | -3.452902  |
| H | -5.022028 | 29.188298 | -2.703064  |
| H | -5.202533 | 30.712518 | -1.827210  |
| C | -3.846680 | 32.318107 | -3.621206  |
| H | -2.951322 | 32.750575 | -4.073989  |
| H | -4.687886 | 32.527744 | -4.285616  |
| H | -4.038047 | 32.833715 | -2.677080  |
| C | -3.514613 | 30.156858 | -4.821630  |
| H | -2.587858 | 30.508125 | -5.281617  |
| H | -3.471748 | 29.067613 | -4.765553  |
| H | -4.344315 | 30.423593 | -5.481979  |
| C | 0.196537  | 32.090193 | -0.337562  |
| C | -0.262561 | 33.527702 | -0.637070  |
| H | -1.282242 | 33.711271 | -0.289882  |
| H | 0.393733  | 34.231526 | -0.120485  |
| H | -0.216517 | 33.757620 | -1.703934  |
| C | 1.654628  | 31.938289 | -0.826204  |
| H | 1.721599  | 32.089178 | -1.906825  |
| H | 2.294194  | 32.679900 | -0.339973  |
| H | 2.055394  | 30.949164 | -0.598310  |
| C | 0.148546  | 31.882918 | 1.193042   |
| H | 0.523174  | 30.899692 | 1.482581   |
| H | 0.764582  | 32.635269 | 1.693266   |
| H | -0.873902 | 31.979270 | 1.566619   |
| N | -1.337137 | 25.313594 | 0.288460   |
| N | 0.253895  | 25.220476 | -1.974315  |
| C | 2.200773  | 23.584323 | -4.792938  |
| C | 3.589693  | 23.656720 | -4.965602  |
| C | 1.408187  | 23.374244 | -5.920299  |
| H | 4.229850  | 23.830157 | -4.108726  |
| H | 0.331142  | 23.314341 | -5.814548  |
| C | 4.161700  | 23.521730 | -6.219879  |
| C | 1.968842  | 23.229570 | -7.188516  |
| H | 5.235269  | 23.585377 | -6.349748  |
| H | 1.319754  | 23.060396 | -8.035996  |
| C | 3.354306  | 23.303584 | -7.342175  |
| C | 3.235091  | 22.949354 | -9.716099  |
| H | 3.954780  | 22.880950 | -10.528116 |
| H | 2.674059  | 22.013946 | -9.645887  |

|   |          |           |           |
|---|----------|-----------|-----------|
| H | 2.548051 | 23.777712 | -9.906879 |
| O | 4.006201 | 23.179332 | -8.532932 |

## Compound 2

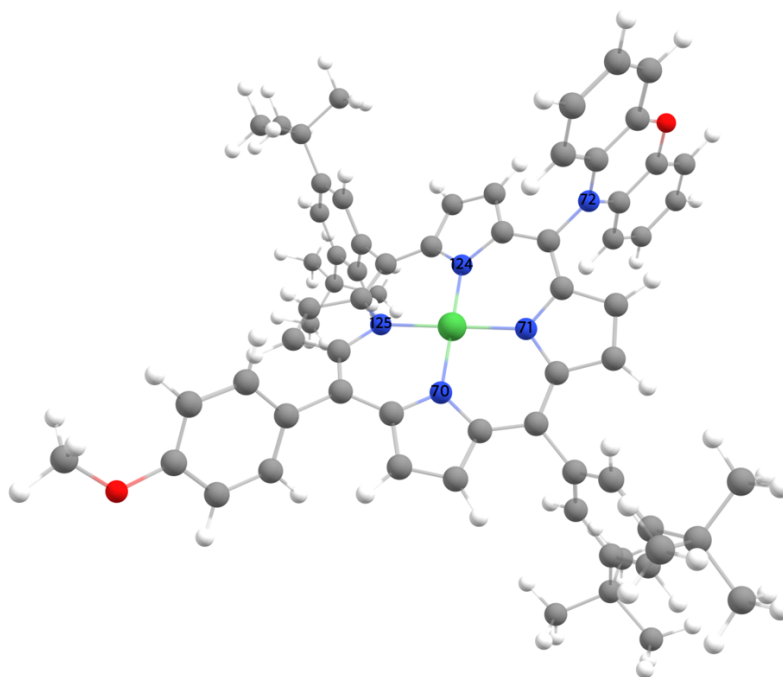

Atom labelling for mono-oxidized compound **2**

### Hyperfine coupling constant

| Center | $A_{\min}$ (MHz) | $A_{\text{mid}}$ (MHz) | $A_{\max}$ (MHz) | $A_{\text{iso}}$ (MHz) |
|--------|------------------|------------------------|------------------|------------------------|
| N70    | -0.01            | 0.02                   | 0.04             | 0.02                   |
| N71    | 0.31             | 0.37                   | 0.69             | 0.46                   |
| N72    | 1.04             | 1.24                   | 51.18            | 17.82                  |
| N124   | 0.34             | 0.40                   | 0.74             | 0.50                   |
| N125   | 0.01             | -0.01                  | 0.04             | 0.01                   |

### Quadrupole coupling constants

| Center | $V_{\min}$ (a.u.) | $V_{\text{mid}}$ (a.u.) | $V_{\max}$ (a.u.) | $e^2qQ$ (MHz) | eta  |
|--------|-------------------|-------------------------|-------------------|---------------|------|
| N70    | -0.20             | -0.25                   | 0.45              | 2.04          | 0.10 |
| N71    | -0.22             | -0.27                   | 0.48              | 2.20          | 0.11 |
| N72    | 0.29              | 0.34                    | -0.63             | -2.85         | 0.08 |
| N124   | -0.21             | -0.27                   | 0.48              | 2.20          | 0.12 |
| N125   | -0.21             | -0.24                   | 0.45              | 2.02          | 0.07 |

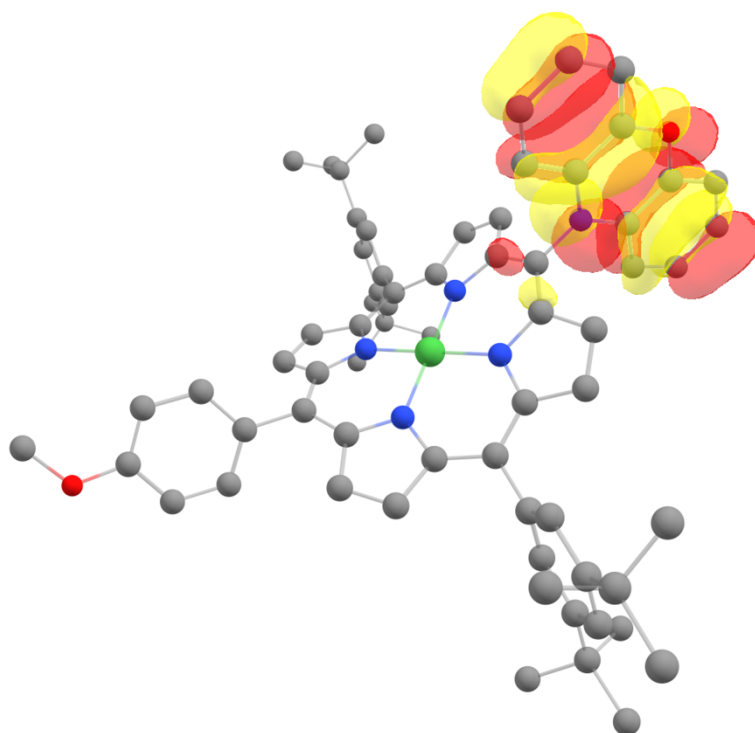

Localized SOMO for **2**.

Cartesian coordinates (Å) of the DFT-optimized structure of mono-oxidized compound **2**

|   |           |           |           |
|---|-----------|-----------|-----------|
| C | 1.540249  | 22.614950 | -2.579296 |
| C | 2.387450  | 21.463227 | -2.747758 |
| H | 2.853708  | 21.163347 | -3.674060 |
| C | 2.497116  | 20.872175 | -1.527673 |
| H | 3.055807  | 19.987193 | -1.261020 |
| C | 1.641290  | 21.603863 | -0.632388 |
| C | 1.305107  | 21.142441 | 0.646107  |
| C | 0.173118  | 21.623256 | 1.297329  |
| C | -0.442732 | 20.985479 | 2.433558  |
| H | -0.028219 | 20.145847 | 2.970978  |
| C | -1.631298 | 21.610263 | 2.646345  |
| H | -2.370521 | 21.389014 | 3.403273  |
| C | -1.698473 | 22.687726 | 1.693913  |
| C | -2.647547 | 23.704824 | 1.712480  |
| C | -3.712886 | 24.000431 | 3.918496  |
| C | -2.555087 | 24.598490 | 4.457474  |
| H | -1.677697 | 24.721331 | 3.835416  |
| C | -2.551299 | 25.022182 | 5.774464  |
| H | -1.657327 | 25.481499 | 6.181909  |
| C | -3.691276 | 24.863405 | 6.588676  |
| H | -3.671791 | 25.201775 | 7.618835  |
| C | -4.840298 | 24.275937 | 6.080161  |
| H | -5.732395 | 24.138586 | 6.680770  |
| C | -4.849293 | 23.847136 | 4.753329  |
| C | -6.056010 | 22.834716 | 3.004217  |

|    |           |           |           |
|----|-----------|-----------|-----------|
| C  | -7.251648 | 22.252430 | 2.584517  |
| H  | -8.071151 | 22.172750 | 3.289825  |
| C  | -7.353269 | 21.794150 | 1.279308  |
| H  | -8.277565 | 21.338911 | 0.940492  |
| C  | -6.263222 | 21.918288 | 0.393416  |
| H  | -6.353633 | 21.557538 | -0.625214 |
| C  | -5.074967 | 22.495427 | 0.805127  |
| H  | -4.241117 | 22.588901 | 0.121135  |
| C  | -4.948497 | 22.966550 | 2.127928  |
| C  | 2.108474  | 20.035758 | 1.254840  |
| C  | 3.370704  | 20.318202 | 1.790018  |
| H  | 3.733361  | 21.340777 | 1.750660  |
| C  | 4.152442  | 19.312925 | 2.376816  |
| C  | 3.632419  | 18.009751 | 2.397366  |
| H  | 4.223777  | 17.222417 | 2.843762  |
| C  | 2.377084  | 17.686107 | 1.858533  |
| C  | 1.623444  | 18.723020 | 1.290332  |
| H  | 0.649817  | 18.516809 | 0.855667  |
| C  | 5.530129  | 19.667359 | 2.970304  |
| C  | 6.435809  | 20.244478 | 1.855559  |
| H  | 7.415756  | 20.515710 | 2.266514  |
| H  | 6.002671  | 21.142987 | 1.404569  |
| H  | 6.592022  | 19.508063 | 1.059029  |
| C  | 6.242603  | 18.445427 | 3.582583  |
| H  | 5.664592  | 18.001786 | 4.401038  |
| H  | 7.210541  | 18.755533 | 3.990985  |
| H  | 6.432149  | 17.667294 | 2.834864  |
| C  | 5.352177  | 20.728333 | 4.083744  |
| H  | 4.717074  | 20.345061 | 4.891003  |
| H  | 4.895919  | 21.647723 | 3.701997  |
| H  | 6.326073  | 20.991807 | 4.512679  |
| C  | 1.816079  | 16.250852 | 1.864583  |
| C  | 2.768258  | 15.246761 | 2.542373  |
| H  | 3.733174  | 15.186793 | 2.026642  |
| H  | 2.319890  | 14.247481 | 2.520094  |
| H  | 2.954240  | 15.503880 | 3.591251  |
| C  | 0.469708  | 16.225882 | 2.626938  |
| H  | 0.604246  | 16.540439 | 3.668312  |
| H  | 0.055656  | 15.210625 | 2.629644  |
| H  | -0.272101 | 16.886672 | 2.166373  |
| C  | 1.586216  | 15.786539 | 0.405719  |
| H  | 0.879939  | 16.436029 | -0.122011 |
| H  | 1.179635  | 14.768345 | 0.392979  |
| H  | 2.526992  | 15.784225 | -0.156872 |
| N  | 1.062966  | 22.675504 | -1.280907 |
| N  | -0.604561 | 22.683201 | 0.859174  |
| N  | -3.781818 | 23.555902 | 2.602794  |
| O  | -5.992095 | 23.275270 | 4.288878  |
| Ni | -0.218604 | 23.912457 | -0.570570 |
| C  | -2.511251 | 24.910846 | 1.032759  |
| C  | -3.278129 | 26.098336 | 1.302604  |
| H  | -4.129360 | 26.164688 | 1.965180  |
| C  | -2.681029 | 27.104194 | 0.609199  |
| H  | -2.956602 | 28.147848 | 0.584746  |
| C  | -1.607112 | 26.516645 | -0.149659 |
| C  | -0.871728 | 27.189445 | -1.121596 |

|   |           |           |            |
|---|-----------|-----------|------------|
| C | -0.087897 | 26.480759 | -2.039361  |
| C | 0.398421  | 27.047946 | -3.268706  |
| H | 0.330956  | 28.091924 | -3.536464  |
| C | 0.894481  | 26.019384 | -4.007315  |
| H | 1.340028  | 26.058168 | -4.989979  |
| C | 0.769751  | 24.830489 | -3.205536  |
| C | 1.347145  | 23.602786 | -3.549239  |
| C | -1.003624 | 28.671906 | -1.278186  |
| C | -2.172921 | 29.242927 | -1.794523  |
| H | -2.989018 | 28.586230 | -2.080430  |
| C | -2.291882 | 30.629922 | -1.961057  |
| C | -1.198930 | 31.428539 | -1.590762  |
| H | -1.274908 | 32.500190 | -1.713198  |
| C | -0.009678 | 30.892007 | -1.072870  |
| C | 0.068943  | 29.499926 | -0.926480  |
| H | 0.969948  | 29.041916 | -0.529891  |
| C | -3.591541 | 31.217934 | -2.544972  |
| C | -4.784939 | 30.830102 | -1.639177  |
| H | -5.718236 | 31.232181 | -2.050627  |
| H | -4.898398 | 29.743798 | -1.556587  |
| H | -4.656214 | 31.234095 | -0.628469  |
| C | -3.550071 | 32.754396 | -2.650433  |
| H | -2.743133 | 33.096769 | -3.308018  |
| H | -4.495030 | 33.117130 | -3.069204  |
| H | -3.418194 | 33.227604 | -1.670768  |
| C | -3.821663 | 30.644178 | -3.964187  |
| H | -2.996001 | 30.912489 | -4.633319  |
| H | -3.905358 | 29.552324 | -3.953671  |
| H | -4.748922 | 31.047251 | -4.387619  |
| C | 1.189757  | 31.769725 | -0.664839  |
| C | 0.936821  | 33.269503 | -0.912532  |
| H | 0.084735  | 33.641945 | -0.333008  |
| H | 1.819916  | 33.842057 | -0.608235  |
| H | 0.751085  | 33.483256 | -1.971011  |
| C | 2.436289  | 31.351537 | -1.482013  |
| H | 2.262570  | 31.486736 | -2.555596  |
| H | 3.298260  | 31.966357 | -1.196430  |
| H | 2.703298  | 30.303641 | -1.311103  |
| C | 1.478548  | 31.572528 | 0.843128   |
| H | 1.711336  | 30.529175 | 1.080087   |
| H | 2.337045  | 32.183709 | 1.146468   |
| H | 0.615748  | 31.872833 | 1.448944   |
| N | -1.503280 | 25.163178 | 0.130795   |
| N | 0.162221  | 25.123385 | -2.000103  |
| C | 1.842912  | 23.411257 | -4.942650  |
| C | 3.210395  | 23.253043 | -5.239431  |
| C | 0.935056  | 23.410756 | -6.011323  |
| H | 3.941989  | 23.277165 | -4.437520  |
| H | -0.125247 | 23.533491 | -5.810480  |
| C | 3.645742  | 23.091100 | -6.548740  |
| C | 1.357367  | 23.242739 | -7.332302  |
| H | 4.701198  | 22.978295 | -6.775723  |
| H | 0.621214  | 23.239326 | -8.127179  |
| C | 2.721843  | 23.080826 | -7.607262  |
| C | 2.354103  | 22.891823 | -9.967351  |
| H | 2.982683  | 22.745252 | -10.846043 |

|   |          |           |            |
|---|----------|-----------|------------|
| H | 1.638717 | 22.065548 | -9.886418  |
| H | 1.810674 | 23.839219 | -10.059976 |
| O | 3.246281 | 22.914211 | -8.852596  |

### Compound 3

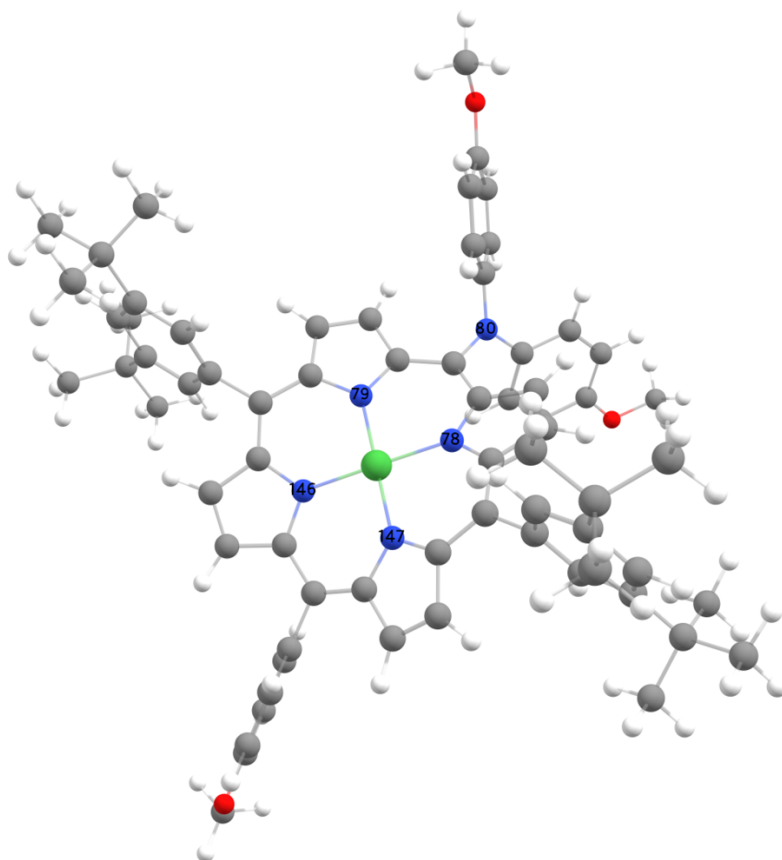

Atom labelling for mono-oxidized compound **3**

### Hyperfine coupling constant

| Center | $A_{\min}$ (MHz) | $A_{\text{mid}}$ (MHz) | $A_{\max}$ (MHz) | $A_{\text{iso}}$ (MHz) |
|--------|------------------|------------------------|------------------|------------------------|
| N78    | -0.23            | -0.23                  | 3.20             | 0.92                   |
| N79    | 0.18             | 0.28                   | 3.97             | 1.48                   |
| N80    | 1.32             | 1.36                   | 42.57            | 15.1                   |
| N146   | 0.11             | 0.17                   | 3.26             | 1.18                   |
| N147   | 0.21             | 0.27                   | 3.40             | 1.29                   |



### Quadrupole coupling constants

| Center | $V_{\min}$ (a.u.) | $V_{\text{mid}}$ (a.u.) | $V_{\max}$ (a.u.) | $e^2qQ$ (MHz) | eta  |
|--------|-------------------|-------------------------|-------------------|---------------|------|
| N78    | -0.21             | -0.24                   | 0.46              | 2.07          | 0.05 |
| N79    | -0.21             | -0.25                   | 0.46              | 2.10          | 0.11 |
| N80    | 0.40              | 0.41                    | -0.81             | -3.68         | 0.02 |
| N146   | -0.20             | -0.25                   | 0.44              | 2.01          | 0.12 |
| N147   | -0.20             | -0.25                   | 0.45              | 2.02          | 0.12 |

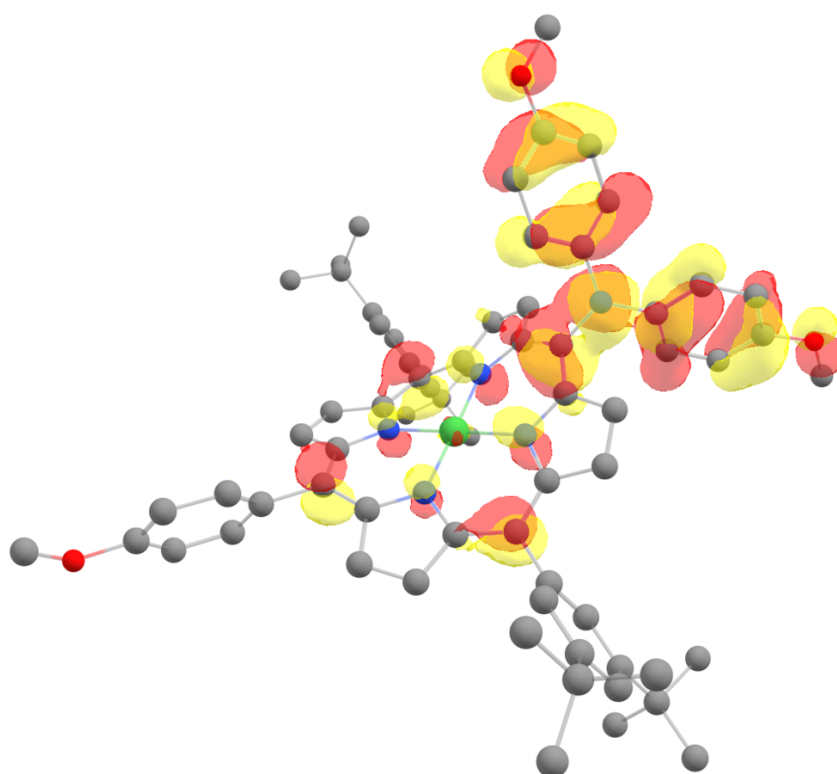

Localized SOMO for **3**.

### Cartesian coordinates (Å) of the DFT-optimized structure of mono-oxidized compound **3**

```
C  3.624142  3.701951 11.507005
C  2.995276  3.462393 12.778596
H  2.682418  2.494465 13.141470
C  2.932971  4.659940 13.421358
H  2.533599  4.864619 14.403885
C  3.456258  5.642118 12.507538
C  3.318699  7.029851 12.690032
C  3.391612  7.934296 11.617828
C  2.973709  9.310980 11.647843
H  2.625013  9.848831 12.515676
C  3.073847  9.772903 10.373095
H  2.839501 10.760536 10.004992
```

|   |           |           |           |
|---|-----------|-----------|-----------|
| C | 3.633691  | 8.709678  | 9.581895  |
| C | 4.104791  | 8.886864  | 8.283698  |
| C | 3.915609  | 7.250757  | 15.032369 |
| C | 5.302835  | 7.264922  | 14.759825 |
| H | 5.654113  | 7.493036  | 13.759600 |
| C | 6.213236  | 7.027408  | 15.770006 |
| H | 7.279925  | 7.054522  | 15.574779 |
| C | 5.771388  | 6.770993  | 17.085426 |
| C | 4.391317  | 6.748654  | 17.362769 |
| H | 4.025427  | 6.533255  | 18.358864 |
| C | 3.477640  | 6.983427  | 16.344831 |
| H | 2.416748  | 6.935220  | 16.562922 |
| C | 6.369568  | 6.325936  | 19.363655 |
| H | 5.811922  | 7.176639  | 19.768240 |
| H | 7.308402  | 6.209323  | 19.903590 |
| H | 5.774660  | 5.411382  | 19.453379 |
| C | 1.767060  | 8.144333  | 14.240643 |
| C | 1.683748  | 9.212117  | 15.162740 |
| H | 2.576666  | 9.564957  | 15.666432 |
| C | 0.471288  | 9.829493  | 15.400581 |
| H | 0.396942  | 10.658229 | 16.096626 |
| C | -0.693768 | 9.401732  | 14.728636 |
| C | -0.613266 | 8.346967  | 13.800660 |
| H | -1.493536 | 7.994447  | 13.277892 |
| C | 0.606963  | 7.729006  | 13.561780 |
| H | 0.658931  | 6.900855  | 12.863307 |
| C | -3.053356 | 9.676819  | 14.408619 |
| H | -2.991941 | 9.810428  | 13.323821 |
| H | -3.813527 | 10.339938 | 14.819824 |
| H | -3.302132 | 8.636903  | 14.643789 |
| C | 3.733278  | 10.137069 | 7.549448  |
| C | 2.448692  | 10.268072 | 7.018800  |
| H | 1.751990  | 9.442854  | 7.130987  |
| C | 2.057022  | 11.436342 | 6.341214  |
| C | 2.995175  | 12.467877 | 6.235526  |
| H | 2.713657  | 13.381389 | 5.726195  |
| C | 4.297104  | 12.375403 | 6.764661  |
| C | 4.652489  | 11.191694 | 7.417024  |
| H | 5.639545  | 11.073040 | 7.848318  |
| C | 0.640250  | 11.530249 | 5.742602  |
| C | -0.411215 | 11.330307 | 6.860579  |
| H | -0.307028 | 10.358123 | 7.353558  |
| H | -1.422111 | 11.384782 | 6.439593  |
| H | -0.319413 | 12.109121 | 7.626369  |
| C | 0.470168  | 10.423995 | 4.672321  |
| H | 1.194950  | 10.552412 | 3.860206  |
| H | -0.536593 | 10.466475 | 4.239794  |
| H | 0.611743  | 9.423907  | 5.095163  |
| C | 0.371253  | 12.892360 | 5.074229  |
| H | 0.454527  | 13.719842 | 5.788057  |
| H | -0.646383 | 12.904811 | 4.669051  |
| H | 1.060518  | 13.082595 | 4.244222  |
| C | 5.263594  | 13.566769 | 6.618312  |
| C | 4.662745  | 14.804296 | 7.329678  |
| H | 5.337488  | 15.662544 | 7.227747  |
| H | 4.518523  | 14.609916 | 8.398630  |
| H | 3.694493  | 15.087176 | 6.904013  |
| C | 5.465932  | 13.889004 | 5.117625  |
| H | 4.524956  | 14.156865 | 4.626179  |

|    |           |           |           |
|----|-----------|-----------|-----------|
| H  | 5.892409  | 13.030438 | 4.586360  |
| H  | 6.154003  | 14.735015 | 5.003813  |
| C  | 6.645060  | 13.281049 | 7.237563  |
| H  | 7.135475  | 12.423458 | 6.763271  |
| H  | 6.577100  | 13.085462 | 8.313558  |
| H  | 7.294343  | 14.152373 | 7.098806  |
| N  | 3.885251  | 5.054877  | 11.347838 |
| N  | 3.814763  | 7.576599  | 10.358304 |
| N  | 2.995989  | 7.496266  | 13.991872 |
| O  | 6.739542  | 6.562396  | 17.998733 |
| O  | -1.826168 | 10.062781 | 15.041315 |
| Ni | 4.621247  | 5.917216  | 9.806078  |
| C  | 5.008550  | 7.979191  | 7.714138  |
| C  | 5.765602  | 8.239737  | 6.521405  |
| H  | 5.627728  | 9.092962  | 5.874085  |
| C  | 6.675548  | 7.233041  | 6.406611  |
| H  | 7.414946  | 7.088697  | 5.632910  |
| C  | 6.426918  | 6.320303  | 7.490050  |
| C  | 7.017065  | 5.051633  | 7.579443  |
| C  | 6.441889  | 4.053202  | 8.375139  |
| C  | 6.772280  | 2.655555  | 8.294529  |
| H  | 7.588201  | 2.237246  | 7.725596  |
| C  | 5.845014  | 1.987478  | 9.034545  |
| H  | 5.759699  | 0.922810  | 9.193153  |
| C  | 5.012457  | 2.982545  | 9.650416  |
| C  | 4.087749  | 2.697294  | 10.665652 |
| C  | 8.165972  | 3.773883  | 5.713903  |
| H  | 7.244162  | 3.235348  | 5.517402  |
| C  | 9.285631  | 3.504844  | 4.938933  |
| H  | 9.252323  | 2.758981  | 4.150903  |
| C  | 10.485090 | 4.202670  | 5.160123  |
| C  | 10.536724 | 5.186262  | 6.157276  |
| H  | 11.446532 | 5.742336  | 6.348950  |
| C  | 9.399516  | 5.454253  | 6.922195  |
| H  | 9.454777  | 6.213159  | 7.697296  |
| C  | 12.779335 | 4.518662  | 4.547623  |
| H  | 13.168325 | 4.347422  | 5.557737  |
| H  | 13.458535 | 4.081111  | 3.815687  |
| H  | 12.689185 | 5.595837  | 4.366870  |
| C  | 3.696505  | 1.277781  | 10.938270 |
| C  | 4.533898  | 0.432040  | 11.667525 |
| H  | 5.480367  | 0.821180  | 12.030815 |
| C  | 4.164797  | -0.896808 | 11.939334 |
| C  | 2.932792  | -1.340565 | 11.447318 |
| H  | 2.628829  | -2.361761 | 11.643003 |
| C  | 2.064142  | -0.516945 | 10.705935 |
| C  | 2.464473  | 0.800629  | 10.463596 |
| H  | 1.832086  | 1.476678  | 9.899778  |
| C  | 5.114386  | -1.798199 | 12.751120 |
| C  | 6.444137  | -1.964454 | 11.975656 |
| H  | 6.931976  | -1.001065 | 11.794486 |
| H  | 7.140311  | -2.590026 | 12.547005 |
| H  | 6.272878  | -2.444811 | 11.005531 |
| C  | 5.400287  | -1.142488 | 14.123866 |
| H  | 4.473845  | -1.003230 | 14.692602 |
| H  | 6.069002  | -1.780219 | 14.713949 |
| H  | 5.880930  | -0.164553 | 14.018081 |
| C  | 4.526446  | -3.200211 | 13.002294 |
| H  | 4.339063  | -3.739228 | 12.067055 |

|   |           |           |           |
|---|-----------|-----------|-----------|
| H | 5.237419  | -3.793274 | 13.587979 |
| H | 3.587946  | -3.154539 | 13.566326 |
| C | 0.724777  | -1.084948 | 10.197676 |
| C | 0.994691  | -2.290664 | 9.264897  |
| H | 0.045999  | -2.701389 | 8.899296  |
| H | 1.591430  | -1.988607 | 8.396830  |
| H | 1.530078  | -3.094784 | 9.780203  |
| C | -0.126060 | -1.552857 | 11.402941 |
| H | 0.386249  | -2.322938 | 11.988684 |
| H | -0.352434 | -0.714218 | 12.071601 |
| H | -1.075378 | -1.975769 | 11.053389 |
| C | -0.092851 | -0.045269 | 9.407098  |
| H | -0.351170 | 0.824997  | 10.020888 |
| H | 0.445532  | 0.306906  | 8.520072  |
| H | -1.030061 | -0.499851 | 9.068244  |
| N | 5.403439  | 6.788570  | 8.289478  |
| N | 5.375228  | 4.245649  | 9.234507  |
| C | 8.202018  | 4.749728  | 6.729663  |
| O | 11.528058 | 3.856854  | 4.358234  |
